# Supplementary material
Source: PubMed Central journal article supplement (PMC3343339)
Supplement: emboj201256s1.pdf [file emboj201256s1.pdf]

## Supplemental figures

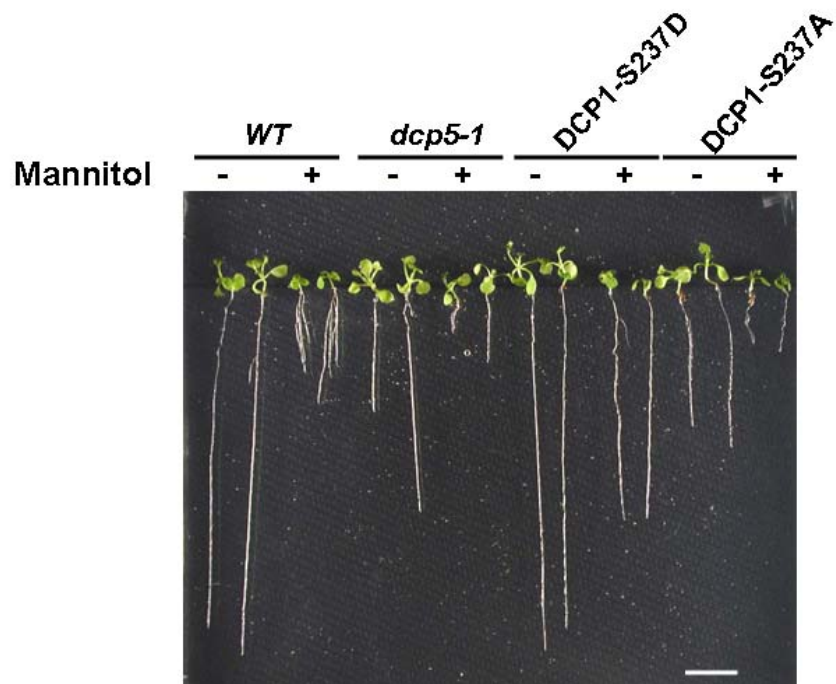

**Figure S1. Growth of representative seedlings after 12 days on medium without (-) or with (+) 5% mannitol. Two seedlings from each treatment group were shown. Bar=1cm**

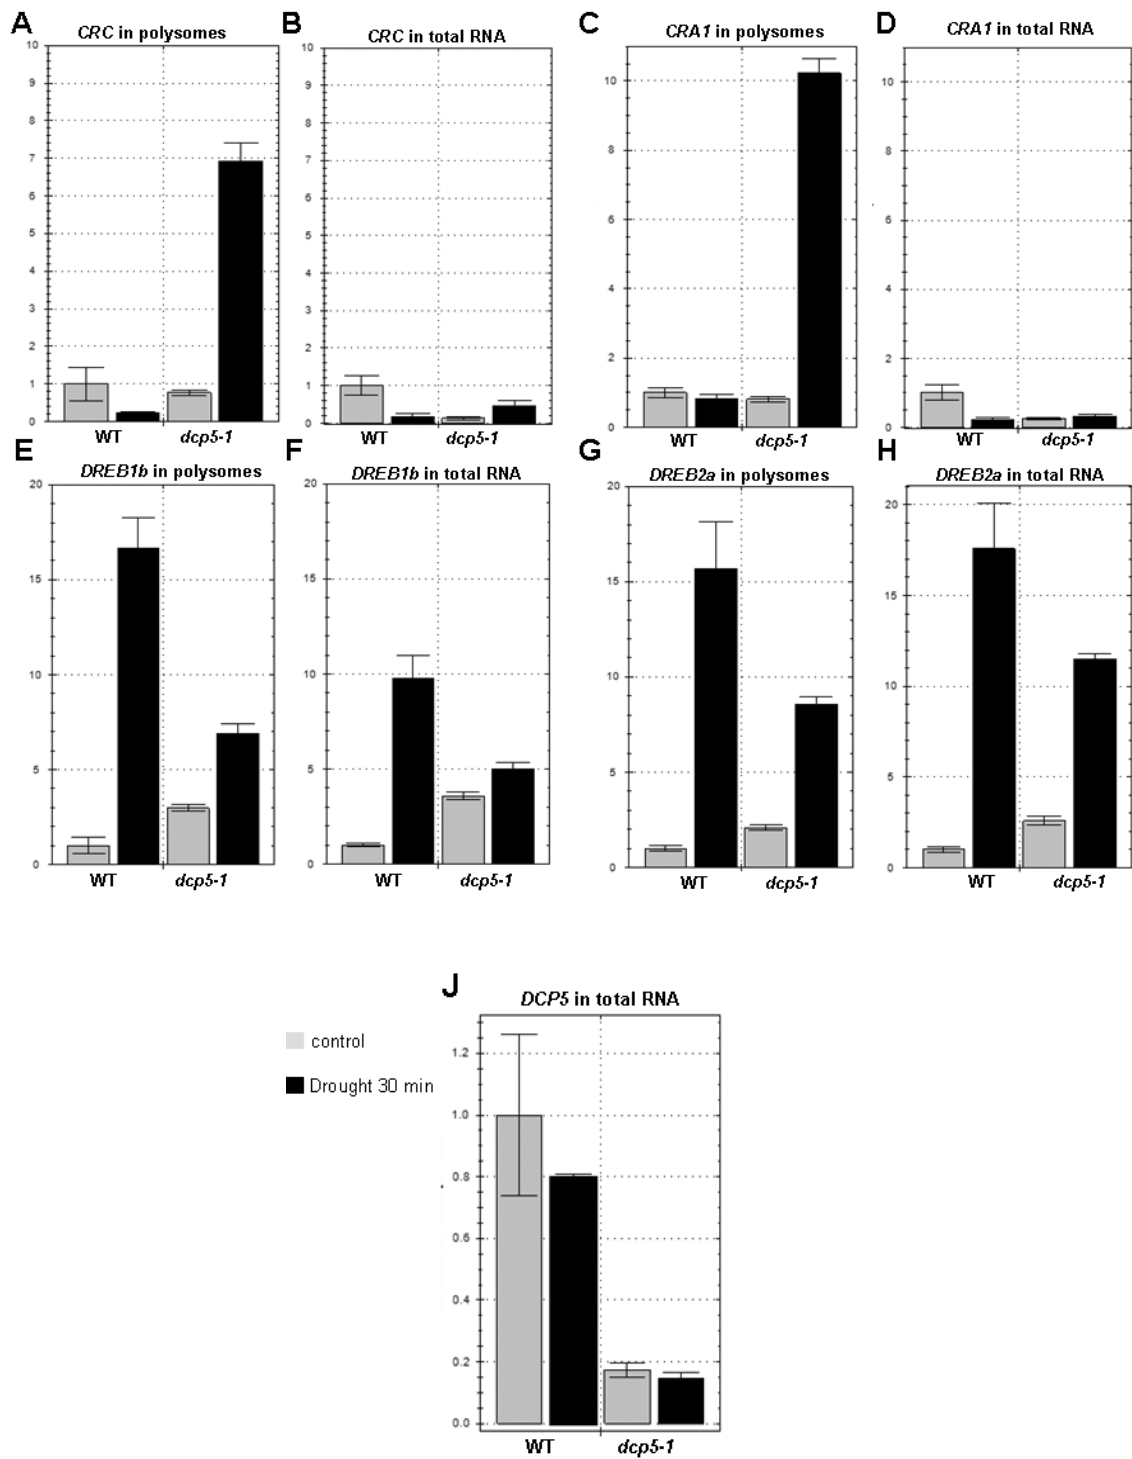

**Figure S2** Relative changes in transcript level of various genes with or without dehydration treatment (30 min) of 12-day old plants were analyzed by qRT-PCR. Transcript levels in WT were set as 1. All transcripts were normalized to *ACTIN2*

transcripts levels. *DCP5* levels (J) was shown as a control. Error bars show standard deviations from 3 independent biological samples.

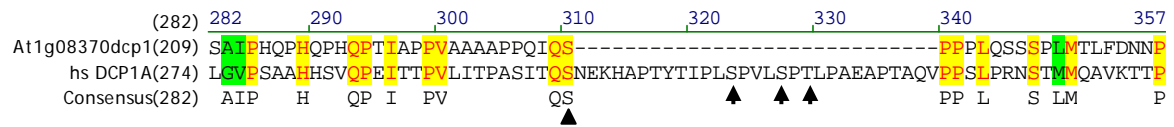

**Figure S3** Alignment of peptide sequences around S237 between Arabidopsis DCP1 and human DCP1A (hsDCP1A). Block shows S237 in Arabidopsis DCP1 and arrows show reported phosphorylation sites for hsDCP1A (Blumenthal et al, 2009). Similar residues were shown in green and identical residues in yellow.
